# Supplementary material for: Hypomethylation of Intragenic LINE-1 Represses Transcription in Cancer Cells through AGO2
Source: PLOS journal article supplement (doi:10.1371/journal.pone.0017934), 2011-03-15
Supplement: S7 (10.1371/journal.pone.0017934.s007) [file journal.pone.0017934.s007]

**Table 5** shows GSE5816 lung cancer and GSE5816 5-AZA treated normal brochial epithelial (hBECs) L1 vs. no L1. The variables I, J, K, L, M, N, O, P refer to the sets of genes in the supplementary Table 4.1b and Table 4.1c. The "+" denotes union operator.  $|I|$  denotes the number of genes in set I. By means of set operations, entries in the 2x2 tables show the resulting number of genes. The p-values of 2x2 tables are obtained from Chi-square distribution.

|       | Down and down | No down or no down    | P-value:   |               |
|-------|---------------|-----------------------|------------|---------------|
| L1    | $ I  = 14$    | $ J + K + L  = 1326$  |            |               |
| No L1 | $ M  = 96$    | $ N + O + P  = 18938$ | Odd ratio: | Lower 95% CI: |
|       |               |                       | 2.08       | Upper 95% CI: |
|       |               |                       |            | 1.14          |
|       |               |                       |            | 3.75          |
